# Supplementary material for: Lattice thermal conductivity and mechanical properties of the single-layer penta-NiN2 explored by a deep-learning interatomic potential
Source: Royal Society of Chemistry journal article supplement (doi:10.1039/d4cp00997e), 2024-01-01
Supplement: d4cp00997e1.pdf [file d4cp00997e1.pdf]

### Supporting Information

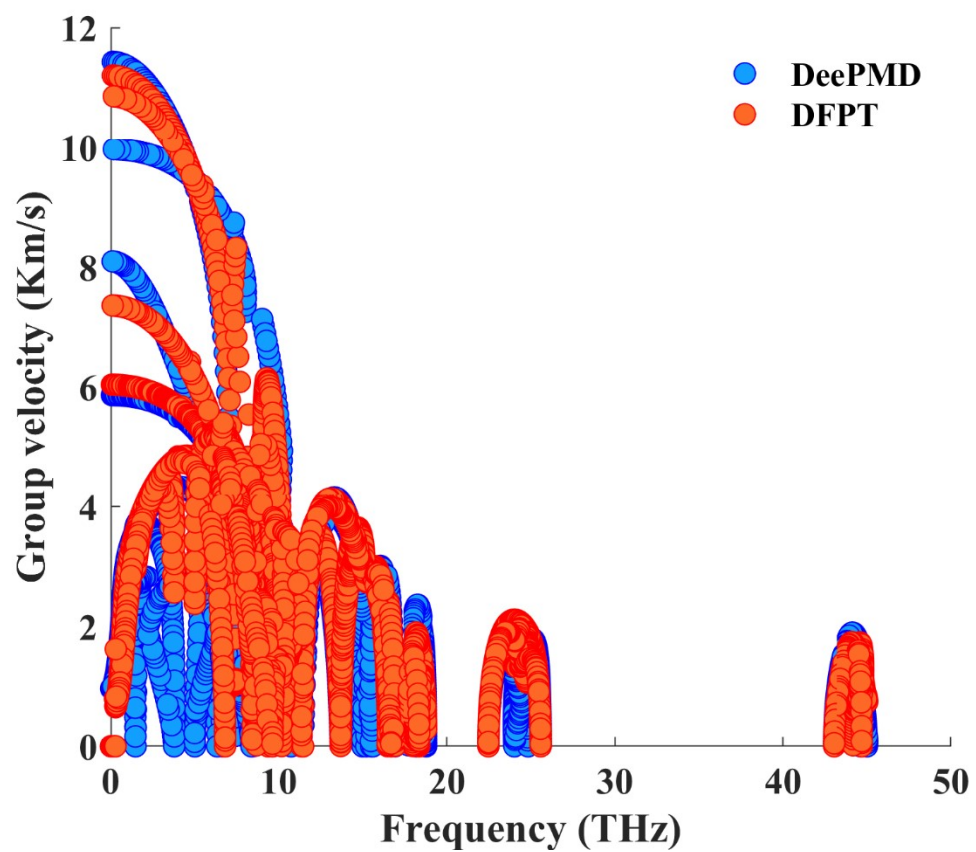

Figure S1: Phonon group velocity calculated from DFPT calculation and deep learning potential.

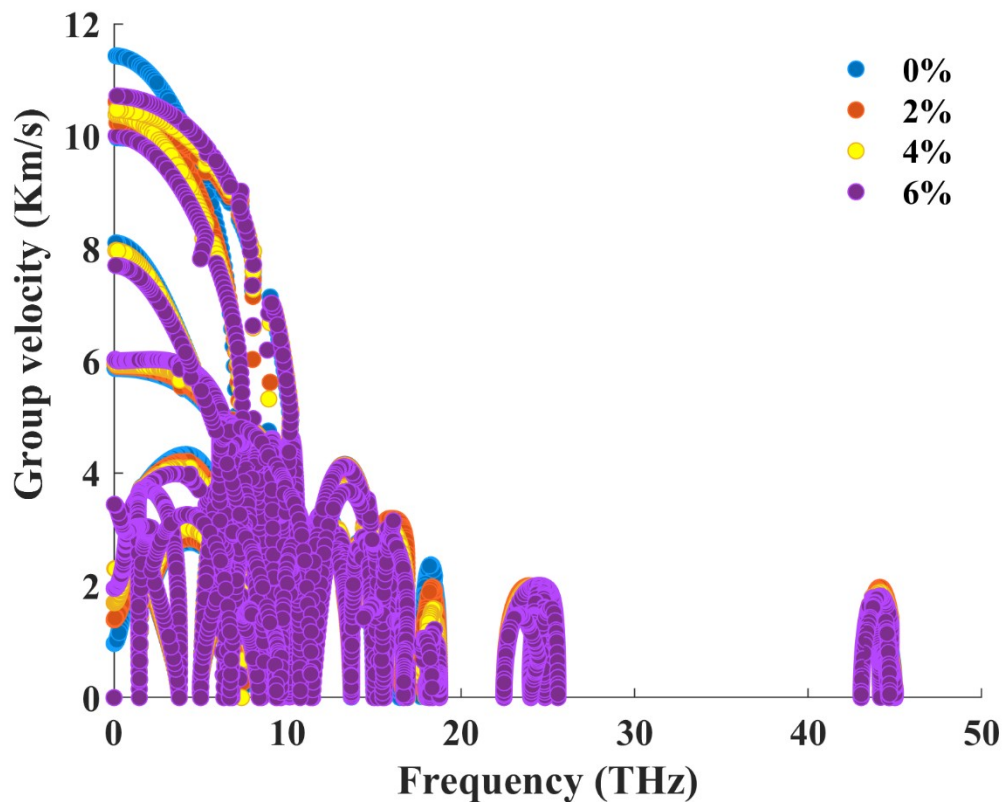

Figure S2: The effect of applied mechanical strain (%) on the phonon group velocity calculated from DLP

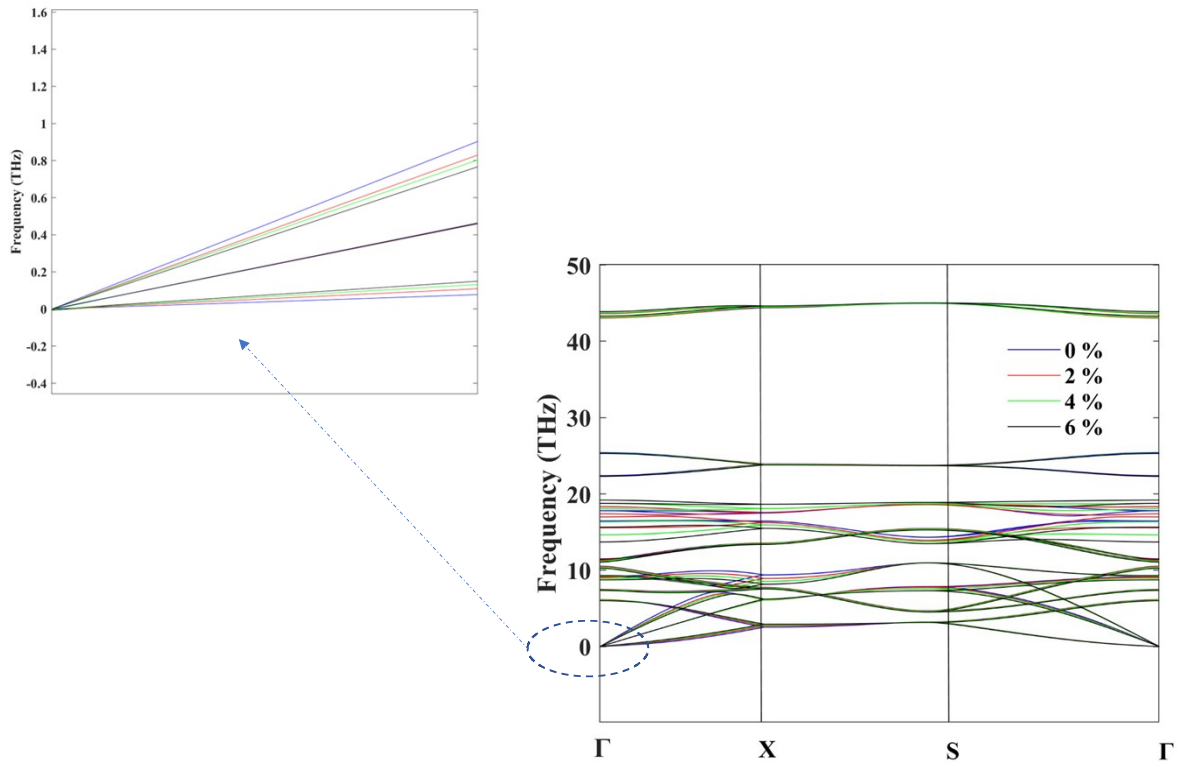

Figure S3: Phonon dispersion relation of penta-NiN2 at different applied strains calculated from DLP
